# Supplementary material for: Microwave-Mediated Synthesis and Characterization of Ca(OH)2 Nanoparticles Destined for Geraniol Encapsulation
Source: MDPI journal article supplement (doi:10.3390/inorganics11120470), 2023-12-02
Supplement: s1 [file s1]

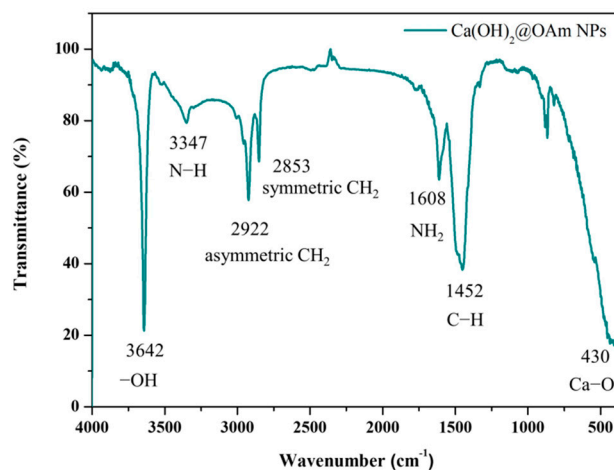

**Figure S1.** FT-IR spectrum of  $\text{Ca(OH)}_2\text{@OAm NPs}$ .

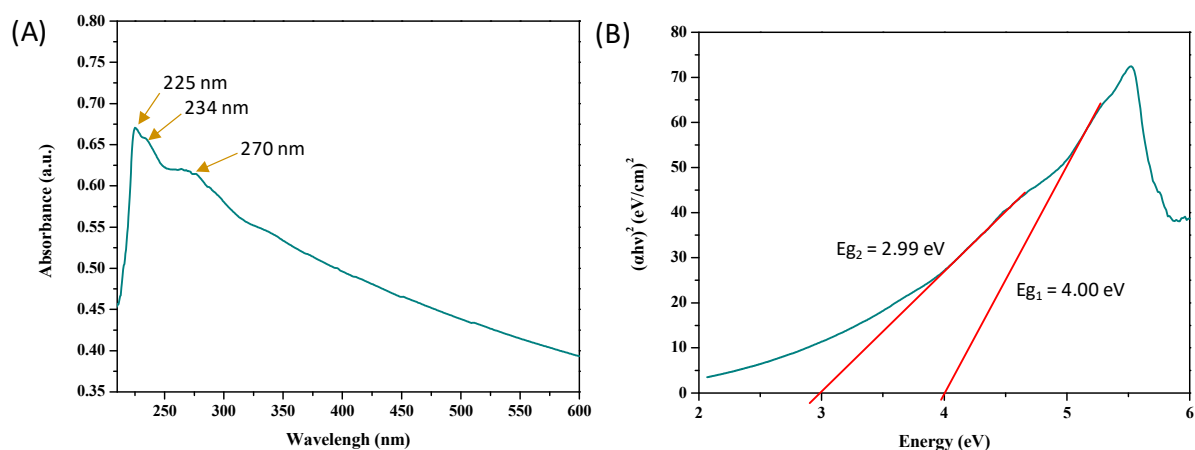

**Figure S2.** Absorption spectra as a function of wavelength (210–600 nm) (A), and Tauc plots of  $(\alpha h\nu)^2$  vs  $h\nu$  with linear relationship (B) for  $\text{Ca(OH)}_2\text{@OAm NPs}$  in ethanol/water solution.

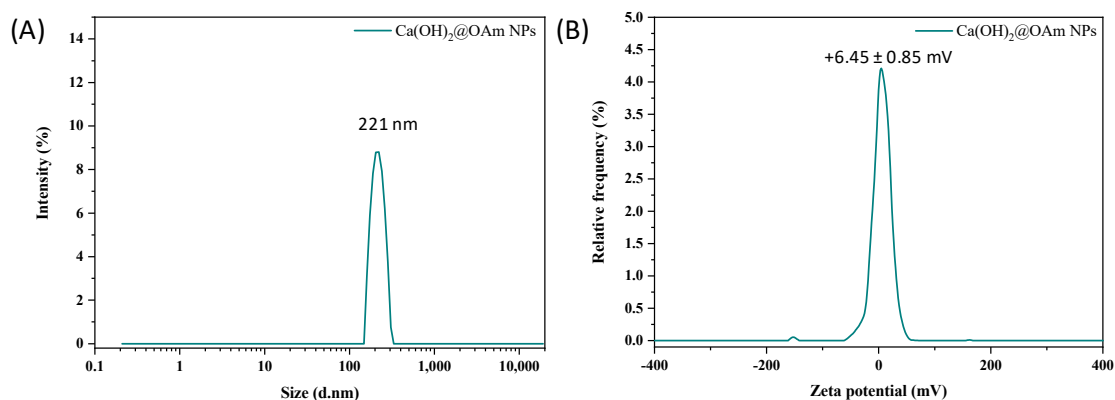

**Figure S3.** Hydrodynamic diameter distribution measured by DLS and  $\zeta$ -potential for  $\text{Ca(OH)}_2\text{@OAm NPs}$  suspension.

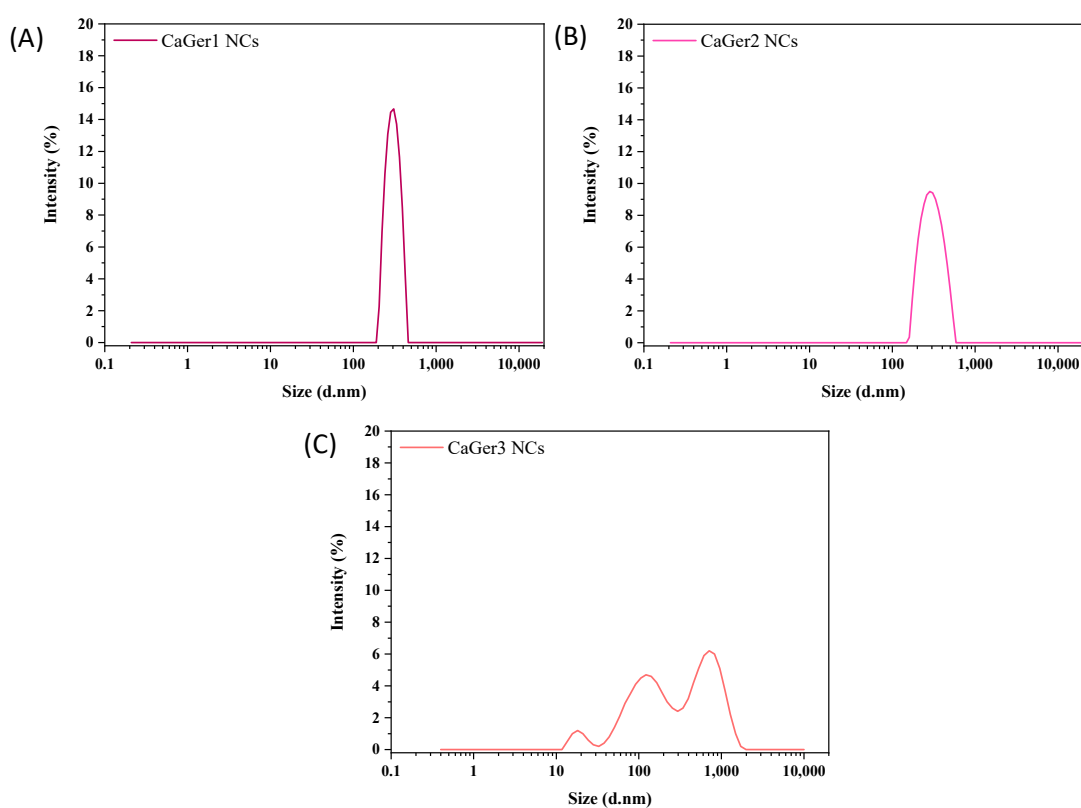

**Figure S4.** Hydrodynamic diameter distribution was measured by DLS for supernatant of CaGer1 NCs (A), CaGer2 NCs (B), and CaGer3 NCs (C) at 25 °C.

**Table S1.** The values ( $R^2$ ,  $K_H$ ,  $n$ ) for the pH-dependent release profiles of CaGer2 NCs are determined using mathematical models; zero-order, first-order, Higuchi, and Korsmeyer-Peppas. The measurements were performed under 25 °C and different pH values (9.2, 7.2, and 5.2) in triplicate.

|           | Zero-order | First-order | Higuchi |       | Korsmeyer-Peppas |       |
|-----------|------------|-------------|---------|-------|------------------|-------|
| pH values | $R^2$      | $R^2$       | $R^2$   | $K_H$ | $R^2$            | $n$   |
| 9.2       | 0.952      | 0.965       | 0.965   | 6.427 | 0.952            | 0.615 |
| 7.2       | 0.741      | 0.787       | 0.949   | 5.690 | 0.911            | 0.368 |
| 5.2       | 0.675      | 0.730       | 0.914   | 5.543 | 0.895            | 0.334 |

**Table S2.** The values ( $R^2$ ,  $K_H$ ,  $n$ ) for the pH-dependent release profiles of CaGer2 NCs are derived using mathematical models; zero-order, first-order, Higuchi, and Korsmeyer-Peppas. The measurements were performed at 35 °C and under different pH values (9.2, 7.2, and 5.2) in triplicate.

| pH values | Zero-order | First order | Higuchi |       | Korsmeyer-Peppas |       |
|-----------|------------|-------------|---------|-------|------------------|-------|
|           | $R^2$      | $R^2$       | $R^2$   | $K_H$ | $R^2$            | $n$   |
| 9.2       | 0.780      | 0.844       | 0.893   | 4.88  | 0.943            | 0.354 |
| 7.2       | 0.683      | 0.776       | 0.831   | 5.23  | 0.845            | 0.361 |
| 5.2       | 0.891      | 0.953       | 0.926   | 7.24  | 0.960            | 0.486 |

**Table S3.** Dynamic Light Scattering Analysis and  $\zeta$ -potential values of CaGer2 NCs at pH 5.2 and 9.2.

| Nanocapsule formulations | DLS (nm)      | PDI   | $\zeta$ -potential (mV) |
|--------------------------|---------------|-------|-------------------------|
| CaGer2 NCs (pH = 5.2)    | 287 $\pm$ 2.7 | 0.106 | -31.5 $\pm$ 1.21        |
| CaGer2 NCs (pH = 9.2)    | 312 $\pm$ 1.8 | 0.183 | -41.3 $\pm$ 1.05        |

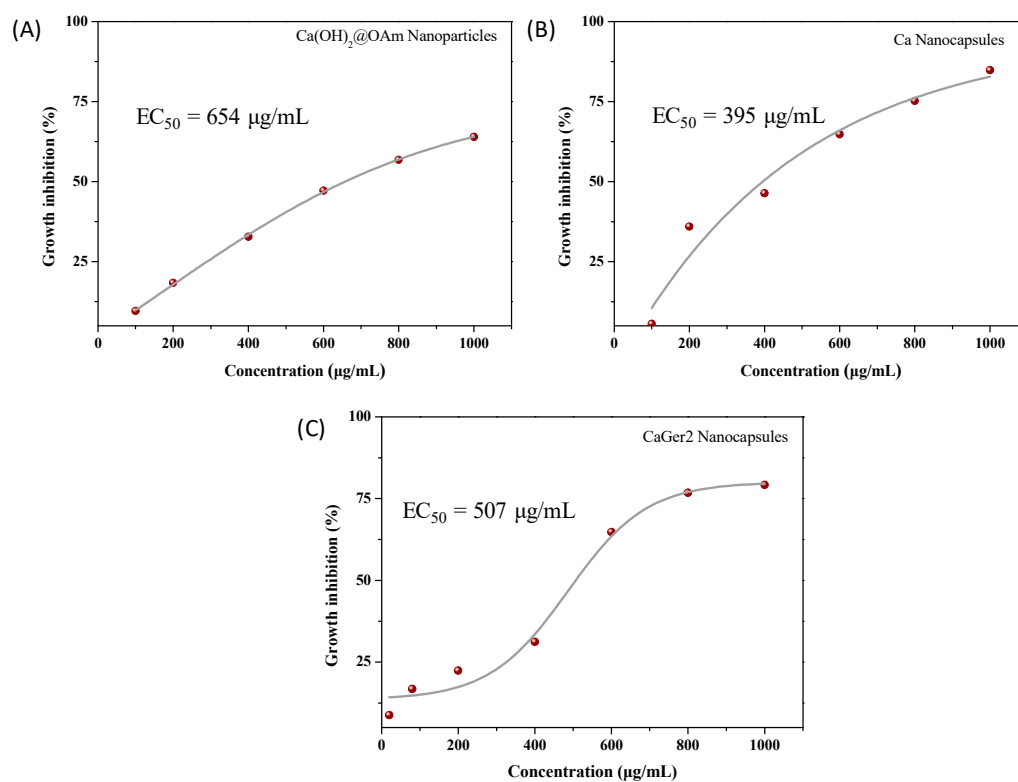

**Figure S5.** Dose–response growth inhibition curves of *B. cinerea* in response to varying concentrations of Ca(OH)<sub>2</sub>@OAm Nanoparticles (A), Ca Nanocapsules (B), and CaGer2 Nanocapsules (C). Each data point represents the mean from ten replicates per nanoformulation concentration (2 experiments, 5 replications) 96 hours after application.
